# Supplementary material
Source: publisher figshare collection journal article supplement (https://tandf.figshare.com/ndownloader/files/35117926)
Supplement: Supplementary file 1 [file 35117926]

**S1. Participant recruitment and exclusion criteria**

To be invited for participation in the experiment, participants had to fulfill a number of criteria: German had to be their only mother tongue (which disqualified 7 sign-ups out of the 481 sign-ups we received) and their planned study abroad had to stretch a minimum of 4 and a maximum of 7 months (which disqualified 64 people). We also excluded participants who planned to go abroad at a later point in time (starting January or February 2019, disqualifying 10 people), as well as people who at the time of sign-up had already been in Spain for more than 2 weeks (getting a proper baseline was no longer possible for those cases, resulting in 74 disqualifications). The remaining 326 were asked to fill in a short questionnaire about their planned university courses while abroad. We were interested in whether they were planning to take courses in English or Spanish. People who indicated planning to take more than 50% of their courses in English were not invited (N = 32) and those who did not fill in this survey were also not invited (N = 100).

On the basis of these exclusions, we ended up inviting 194 German native speakers. 34 of those did not finish the tasks of the first session (T1) and were hence excluded from the remainder of the experiment. An additional 8 did complete T1 tasks, but had empty recordings and were hence also excluded from continuing with the experiment. The remaining 152 participants proceeded to the second session (T2). Out of those, 4 decided to prolong their study abroad and hence had to leave the study after the T2 measurement. 7 did not complete the T2 tasks and 8 had empty recordings and were hence excluded from the rest of the experiment as well. The remaining 134 participants moved on to the last session of the experiment (T3). Twelve of them did not complete the T3 tasks and 5 had empty recordings, resulting in a pre-final dataset of 117 participants, for whom we have complete Spanish recordings for all three time points. Out of those, another 18 only have partial fluency data for T2 and T3, resulting in a final data set of 99 participants, for whom we have complete T2 and T3 data. Next to exclusions based on data availability, we also excluded two participants because their audio recordings indicated that, prior to their spoken response, they had typed on their computer keyboards on more than 20% of the trials of the Spanish naming task at either T2 or T3, casting doubt on the integrity of their answers.

**S2. Email reminders**

We repeatedly checked whether participants had completed their tasks, and if not, sent them reminders: the first reminder was sent four to six days after initial invitation (necessary for 46% of participants at T2 and 71% at T3), a second reminder after eight to ten days (necessary for 18% at T2 and 39% at T3), a third reminder after 12 to 14 days (necessary only at T3 for 2%), and in extreme cases one final reminder after 20 days (sent to 2% of participants at T3).

**S3. Session scheduling**

**T2 timing.** As described in the manuscript, we rescheduled the T2 session for participants who went to Germany for Christmas.Participants who went back to Germany for a week or longer and who were going to have less than three times as many days left in Spain after Christmas as they went to Germany for were invited to complete T2 before Christmas (29 out of the 97 participants). The rest of the participants were invited for T2 two weeks before they left Spain.

**T3 timing.** As described in the manuscript, T3 was timed such that participants had either not been abroad since their return to Germany or only briefly (and at least one month ago). 16 out of our 97 participants indicated to have been to Spanish-speaking countries between T2 and T3 (*M* = 20.5 days, *SD* = 18 days, range = 4-60 days).

**S4. Fluency task details**

For the letter fluency tasks, for each of the two languages, we selected three frequent word onset letters and randomly assigned them to the three sessions with the constraint that no letter that was part of the English fluency tasks would appear in the German fluency tasks and vice versa. For the semantic category fluency tasks, we compiled a list of 18 possible categories based in part on semantic category norms (Battig & Montague, 1969; Ruts et al., 2004; Overschelde et al., 2004). We then pre-tested those with seven participants in German and English, chose the 12 categories with the most answers, and assigned each category to a language and session, choosing the easiest for the English tasks to make sure participants would be able to do the task even if their English proficiency was low (see Table S4).

Table S4

*Letters and categories chosen for the fluency tests*

|  | **English** | |  | **German** | |
| --- | --- | --- | --- | --- | --- |
|  | **Letter** | **Categories** |  | **Letter** | **Categories** |
| T1 | F (2510, 3126) | land animals,  professions |  | P (2337, 4605) | kitchen utensils,  vegetables |
| T2 | A (2720, 3649) | clothes,  fruit |  | M (2212, 5264) | hygiene/bathroom supplies,  transportation means |
| T3 | D (3026, 4175) | body parts,  electronic devices |  | B (2820, 8338) | sports,  office supplies |

*Note.* Numbers in brackets reflect an estimate of the number of words that start with the letter in question in English or German respectively (counts are based on English and German lemmas in the Celex database, followed by counts based on the English and German Subtlex databases).

**S5. Questionnaires at T1, T2 and T3**

# T1-specific questions.

# Wie alt bist du? [How old are you?]

# Geschlecht [gender]

# Männlich [male]

# Weiblich [female]

# Sonstiges [other]

# In welcher Stadt oder Region bist du aufgewachsen? Wenn du in mehreren Regionen aufgewachsen bist, nenne sie bitte alle chronologisch und mit einer ungefähren Zeitangabe, wie lange du im jeweiligen Gebiet gewohnt hast. [In which city or region did you grow up? If you grew up in multiple regions, please name them all together with a rough time indication of when you lived in the respective region.]

# In welcher Sprache war deine schulische Ausbildung? Es geht um nicht-sprachliche Fächer (Mathe, Physik, Geschichte etc.). Mehrere Antworten sind möglich: gib dann bitte für jede Sprache an, welche Fächer n dieser Sprache unterrichtet wurden. Wenn alles auf Deutsch life, schreibe dann einfach ‘alle’ in das Feld neben “Deutsch”. [In which language was your school education? This concerns non-language subjects, such as math, physics and history. Please indicate for each language, which subjects were taught in it. If all courses were taught in German, just enter “all’ in the field next to ‘German’.]

# Deutsch [German]

# Englisch [English]

# Französisch [French]

# Spanisch [Spanish]

# Sonstiges [other]:

# Bist du momentan Student? [Are you currently a student?]

# Ja [yes]

# Nein [no]

# Wenn ja, an welcher deutschen Uni studierst du? [If so, at which German university do you study?]

# In welchem Studienjahre befindest du dich? [In which study year are you?]

# 1. Jahr Bachelor [1st year Bachelor]

# 2. Jahr Bachelor [2nd year Bachelor]

# 3. Jahr Bachelor [3rd year Bachelor]

# 1. Jahr Master [1st year Bachelor]

# 2. Jahr Master [2nd year Bachelor]

# Sonstiges: [other]

# In welcher Sprache studierst du (in Deutschland)? Mehrere Antworten sind möglich. Gib für jede Sprache bitte an, zu wie viel Prozent dein Studium in dieser Sprache stattfindet. [Which language do you study in? Multiple answers are possible. For each language, please indicate to what percent your studies are held in that language.]

# Deutsch [German]

# Englisch [English]

# Französisch [French]

# Spanisch [Spanish]

# Sonstiges [other]

# Wann bist du nach Spanien umgezogen (oder wann wirst du umziehen)? [When did you move to Spain (or when will you move to Spain)?]

# Während deines Auslandsaufenthaltes wirst du: [During your study abroad you will:]

# An der Gastuni studieren [study at the host university]

# Ein Praktikum absolvieren [do an internship]

# Als Au-pair arbeiten [work as au-pair]

# Anderweitig arbeiten [work elsewhere]

# Sonstiges [other]

# Warst du bisher schon einmal länger als 3 Monate im spanischsprachigen Ausland? [Have you ever lived in a Spanish-speaking country for more than 3 months?]

# Ja [yes]

# Nein [no]

# Wenn ja, wo und wie lange warst du im spanischsprachigen Ausland? [If so, where and for how long did you live there?]

# Warst du bisher schon einmal länger als 3 Monate im nicht-spanischsprachigen Ausland? [Have you ever lived in a non-Spanish-speaking country for more than 3 months?]

# Ja [yes]

# Nein [no]

# Wenn ja, wo und wie lange warst du im nicht-spanischsprachigen Ausland? [If so, where and for how long did you live there?]

# Welche Fremdsprachen sprichst du? [Which foreign languages do you speak?]

# Englisch [English]

# Französisch [French]

# Spanisch [Spanish]

# Niederländisch [Dutch]

# Portgusiesisch [Portuguese]

# Italienisch [Italian]

# Russisch [Russian]

# Chinesisch [Chinese]

# Arabisch [Arabic]

# Katalanisch [Catalan]

# Latein [Latin]

# Sonstiges [other]

# Beschreibe auf Spanisch, warum du dich für einen Auslandsaufenthalte in Spanien entschieden hast. [Describe in Spanish why you chose to study abroad in Spain.]

# Hast du dich auf den Auslandsaufenthalt vorbereitet? [Did you prepare for the study abroad?]

# Ja, mit einem Sprachkurs [yes, with a language course]

# Ja, mit Büchern über Land und Leute [yes, with books about the country and people]

# Ja, durch einen online Kurs, bzw. eine Sprachlernapp [yes, via an online language course / a language learning app]

# Ja, administrative (Immatrikulation an der Gastuni, Flugtickets etc.) [yes, administratively (enrolled at host university, flight tickets, etc.)]

# Nein, ich kenne das Land und die Sprache bereits gut [no, I already know the country and the language well]

# Nein, keine Zeit [no, no time]

# Nein, kein Interesse [no, no interest]

# Sonstiges: [other]

# Was erhoffst du dir von deinem Auslandsaufenthalt? [What do you expect from your study abroad?]

# Spanisch zu lernen / zu perfektionieren [learn / perfectionate Spanish]

# Spanische Freundschaften [Spanish friends]

# International Freundschaften [international friends]

# Einfach mal raus aus Deutschland [just to get out of Germany once]

# Neue Kultur kennen lernen [getting to know a new culture]

# Sommer, Sonne, Strand … [summer, sun, beach …]

# Keine Erwartungen [no expectations]

# Sonstiges [other]

# Hast du dich bewusst für Spanien entschieden? [Did you specifically choose Spain as your study abroad destination?]

# Ja, definitive, wenn ein Auslandsjahr, dann im spanischsprachigen Raum [yes, if I go abroad, then to a Spanish-speaking country]

# Ja, aber ich wäre auch woanders hingegangen [yes, but I would have also gone somewhere else]

# Nein, Hauptsache ins Ausland [no, any country abroad would have been good]

# Nein, ich eigentlich woanders hin [no, I actually wanted to go somewhere else]

# Nein, aber in Spanien gab es noch genügend Plätze [no, but in Spain there were still enough spots]

# Sonstiges [other]

# T2-specific questions.

# Beschreibe auf Spanisch, was dir an deinem Auslandsaufenthalt besonders gut und was dir weniger gut gefallen hat. Würdest du einen solchen Auslandsaufenthalt weiterempfehlen?

# [Describe in Spanish what you liked most and least about your study abroad. Would you recommend a study abroad to other people?]

# Wie würdest du deinen Auslandsaufenthalt in den folgenden Aspekten bewerten?

# [How would you describe your study abroad in the following aspects?]

# 1 sehr schlecht / total unzufrieden [very bad, completely satisfied] – 4 neutral – 7 sehr gut, vollkommen zufrieden [very good, completely satisfied]

# Insgesamt [overall]

# Aus sprachlicher Sicht (Hast du sprachlich Fortschritte gemacht? Kann sich auf Spanish aber auch Englisch beziehen?) [Linguistically (Did you improve your language skills, either English or Spanish?)]

# Aus sozialer Sicht (Warst du zufrienden mit deinem Sozialleben, oder hättest du lieber mehr / weniger Kontakte geknüpft?) [Socially (Were you happy with your social life abroad, or would you have liked to have more social contacts?)]

# Aus fachlicher Sicht (Hast du viel gelernt? War es für dein Fachstudium bereichernd?) [Professionally (Did you learn a lot? Was it beneficial for your studies?]

Was beschreibt deine Wohnungssituation im Ausland am besten? [What best describes your living situation abroad?]

- WG / Wohnheim [shared living arrangement]
- Gastfamilie [host family]
- Eigene Wohnung [own apartment]
- Other:

Welche Kurse hast du an der spanischen/lateinamerikanischen Uni besucht? Trage jeweils den Namen des Kurses ein, die Sprache in der er abgehalten wurde und wie viele Stunden pro Woche er lief. [Which courses did you follow at the Spanish university? Enter the name of the course, the language it was held in and how many hours it took per week.]

# Wie integriert würdest du sagen warst / bist du in die spanische Gemeinschaft / Kultur und Sprache? [How integrated were you in the Spanish culture and language?]

# 1 überhaupt nicht integriert [not integrated at all] – 4 neutral – 7 vollständig integriert [completely integrated]

# Sprache [language]

# Kultur / Geseelschaft [culture]

Hast du Spanien/Lateinamerika während deines Auslandsaufenthaltes verlassen? Uns geht es hier um Reisen / kurze Trips in andere Länder, wo nicht Spanisch gesprochen wird, also zum Beispiel wenn du einen Freund in einem anderen nicht-spanischsprachigem Land besucht hast. *[Did you leave Spain during your study abroad? We specifically mean short trips to other countries, for example, to other countries where no Spanish is spoken.]*

- Ja [yes]
- Nein [no]

# Wenn ja, gib für alle Reisen in nicht-spanischsprachige Gebiete an, wohin und für wie lange du dort warst. [If so, indicate for all trips, where you went and for how long you went.]

# Bist du nach Ende des Semesters noch privat in Spnish geblieben, oder wirst du noch bleiben? [Did you privately stay in Spain after the end of your study abroad semester?]

- Ja [yes]
- Nein [no]

# Wenn ja, wie viele Wochen bist du noch geblieben, bzw. wirst du noch bleiben? [If so, how many extra weeks did or will you stay?]

Wenn ja, hat sich in der Zeit dein Sprachgebrauch geändert, bzw. wird er sich wohlmöglich ändern? Bist du zum Beispiel mit deutschen Freunden gereist, und hast dadurch plötzlich mehr Deutsch gesprochen? Oder warst du mit anderen internationalen Studenten unterwegs, mit denen du nur noch Englisch gesprochen hast? Wenn sich nichts großartig verändert hat / verändern wird, schreib' einfach "Nein" in das Feld, in allen anderen Fällen gib so viel Infos, wie möglich. *[If so, did your language change / will it change? Are you, for example, travelling with German friends, or with international friends, with whom you solely speak English? If nothing changes / changed, just enter ‘no’, otherwise provide as much information as possible.]*

# Wie hast du deine Freizeit im Ausland verbracht? Gib im Feld neben jeder ausgewählten Aktivität an, zu wie viel Prozent du deine Freizeit damit gestaltet hast. [How did you spend your freetime abroad? Indicate for each activity to what percent you spent you free time with this activity.]

# Vereinsaktivitäten (Sportclub, Chor, Tanzgruppe, etc.) [social activities in organized groups, such as sports club, choir, dance group etc.]

# Partys / Kneipenabende [partys, bar evenings]

# Reisen [travelling]

# Kulturelle Aktivitäten (Museum, Theater, Konzerte etc.) [cultural activities, such as museum, theatre or concert visits]

# Netflix / TV schauen (allein zuhause) [Netflix, watching TV, alone at home]

# Lesen (Zeitung, Bücher…) [reading book or magazines]

# Anderweitig Zeit mit Freunden (in Situationen die hier nicht aufgelistet sind) [otherwise spent time with friends in situations that are not listed here]

# Wann genau hast du Spanien endgültig verlassen, bzw. wirst du Spanien verlassen?

# [When did you leave Spain / when will you leave Spain for good?]

# T3-specific questions.

Beschreibe auf SPANISCH, was deiner Meinung nach die größten Unterschiede zwischen Spaniern und Deutschen sind und warum. Denke hierbei an Mentalitiit und Lebensweise, aber auch an das Unisystem. Vermisst du die spanische Lebensweise, oder bist du froh wieder in Detuschland zu sein? *[Describe in Spanish what you consider to be the biggest differences between Spanish and German people. Think about mentality, way of living, but also the university system. Do you miss the Spanish way of life, or are you happy to be back in Germany?]*

In welchen Kontexten verwendest du aktuell noch Spanisch?

*[In which contexts do you currently still use Spanish?]*

Hast du noch Kontakt zu Leuten, die du in Spanien kennen gelernt hast? Wenn ja, mit wem und wie intensiv?

*[Are you still in touch with people you met in Spain? If so, with whom and how intensively?]*

Gab es seit Rückkehr nach Deutschland Phasen mit deutlich mehr (oder deutlich weniger)

Spanischkontakt, durch z.B. Besuch aus Spanien, einer Reise nach Spanien oder dergleichen? Beschreibe die Situation kurz und gib eine ungefähre Zeitangabe.

*[Have there been phases with clearly more (or less) Spanish use since you returned to Germany, for example because of visitors from Spain, or a trip to Spain? Describe the situation briefly and provide an approximate time indication.]*

Hast du seit deiner Rückkehr aus Spanien/Lateinamerika noch Unterricht auf Spanisch gehabt (Kurse an der Uni, Sprachkurs)?

*[Have you followed Spanish courses since you returned from Spain? (e.g., at university, or a language course)]*

- Ja *[yes]*
- Nein *[no]*

Liste hier alle Kurse denen du derzeit (bzw. seit Rückkehr aus Spanien/LA) auf Spanisch folgst / gefolgt hast. *[List all courses that you followed in Spanish since returning from Spain.]*

|  | Kurstitel [title] | Stunden/Woche [hours/week] | Ungefährer Zeitraum [appr. time range] |
| --- | --- | --- | --- |
| Kurs 1 |  |  |  |
| … |  |  |  |

Was ist deine aktuelle Wohnsituation? [What is your current living situation?]

- Eigene Wohnung [own apartment]
- WG mit Deutschen [shared apartment with Germans]
- WG mit unter anderen spanischsprachigen Leuten [shared apartment with Spanish-speaking people]
- WG mit internationalen Leuten (aber nicht spanischsprachig) *[shared apartment with non-Spanish speaking internationals]*

Inwiefern stimmst du den folgenden Aussagen zu? *[To what extent do you agree with the following statements?]*

1 (stimme überhaupt nicht zu *[absolutely disagree]*)– 4 (neutral) – 7 (stimme absolut zu *[absolutely agree]*)

- Ich probiere aktiv mein Spanisch zu erhalten. *[I actively try to maintain my Spanish.]*
- Ich bin in Deutschland viel mit Spaniern in Kontakt. [In Germany I’m often in touch with Spanish people.]
- Ich schaue Filme/Serien auf Spanisch. [I watch movies and series in Spanish.]
- Ich lese Bücher auf Spanisch. [I read books in Spanish.]

# Motivation questionnaire (identical at T1, T2 and T3)

Answers were given on a 7-point Likert scale from 1 – stimme überhaupt nicht zu *[I do not agree at all]* to 7 – stimme vollständig zu *[I fully agree].* The table below shows all questions, as well as their category assignment and whether they were negatively phrased or not. The latter two types of information were not provided to participants.

| **Question** | **Category** | **Negative** |
| --- | --- | --- |
| Ich würde gern viele Fremdsprachen fließend und perfekt sprechen können. *[I would like to be able to speak many foreign languages fluently and perfectly.]* | interest in foreign languages (FL) | 0 |
| Spanier sind sympathisch und gastfreundlich. *[Spanish people are likable and welcoming.]* | attitude towards Spanish people | 0 |
| Spanisch lernen ist wichtig, weil es mir erlaubt mich wohler zu fühlen, wenn ich mit Spaniern spreche. *[Learning Spanish is important because it allows me to feel more at ease when I speak to Spanish people.]* | Integrative motivation | 0 |
| Fremdsprachen lernen ist unangenehm. *[Learning foreign languages is uncomfortable.]* | interest in FL | 1 |
| Spanisch lernen ist wichtig, da ich es für meine berufliche Karriere brauche. *[Learning Spanish is important because I need it for my career.]* | Instrumental motivation | 0 |
| Ich würde gern Zeitungen in vielen verschiedenen Sprachen lesen können. *[I would like to be able to read the newspaper in many different languages.]* | interest in FL | 0 |
| Ich verstehe nicht warum manche Austauschstudenten nervös werden, wenn sie Spanisch sprechen müssen. *[I don’t understand why some exchange students get nervous when speaking Spanish.]* | anxiety | 1 |
| Die meisten Spanier sind sympathisch und es ist so einfach sich gut mit ihnen zu verstehen, dass ich froh bin, sie als Freunde zu haben. *[Most Spanish people are likable and it is so easy to get along well with them that I’m happy to have them as my friends.]* | attitude | 0 |
| Spanisch lernen ist wichtig, da es mir erlaubt mit mehr Leuten in Kontakt zu treten und zu sprechen. *[Learning Spanish is important because it enables me to get in touch and speak with more people.]* | integrative | 0 |
| Ich habe kein Interesse an Fremdsprachen. *[I’m not interested in foreign languages.]* | interest in FL | 1 |
| Ich bin selbstsicher, wenn ich im Restaurant auf Spanisch mein Essen bestelle oder jemandem auf der Strasse den Weg weise. *[I’m confident when I order food in Spanish at a restaurant or when I talk to someone on the street to show them the way.]* | anxiety | 1 |
| Spanisch lernen ist wichtig, da es mich gebildeter macht. *[Learning Spanish is important because it makes me more educated.]* | instrumental | 0 |
| Ich hätte gern viele spanische Freunde. *[I would like to have many Spanish friends.]* | attitude | 0 |
| Ich würde wirklich gern viele Fremdsprachen sprechen können. *[I would really like to be able to speak many foreign languages.]* | interest in FL | 0 |
| Die Spanier sind sehr sozial und liebenswürdig. *[The Spanish people are very sociable and loveable.]* | attitude | 0 |
| Ich habe kein Problem mit Leuten auf der Strasse auf Spanisch zu sprechen. *[I have no problem talking to people in Spanish on the street.]* | anxiety | 1 |
| Spanisch lernen ist wichtig, da es mir dabei helfen wird, die spanische Lebensweise zu leben und zu verstehen. *[Learning Spanish is important because it will help me understand and live the Spanish way of life.]* | integrative | 0 |
| Spanier haben viel worauf sie stolz sein können, da sie viel zur Welt beigetragen haben. *[The Spanish people have a lot tob e proud of because they contributed a lot to the world.]* | attitude | 0 |
| Es ist wichtig Fremdsprachen zu lernen. *[It is important to learn foreign languages.]* | interest in FL | 0 |
| Es ist wichtig Spanisch zu lernen um einen guten Job zu finden. *[It is important to learn Spanish to find a good job.]* | instrumental | 0 |
| Wenn ich längere Zeit in ein fremdes Land gehe, versuche ich die Landessprache zu lernen. *[If I move to a foreign country for a longer period of time, I try to learn the language.]* | interest in FL | 0 |
| Ich würde gern mehr Spanier kennen lernen. *[I would like to meet more Spanish people.]* | attitude | 0 |
| Spanisch lernen ist mir wichtig, weil ich so einfacher mit Spaniern in Kontakt kommen könnte. *[Learning Spanish is important to me because it allows me get into touch with Spanish people more easily.]* | integrative | 0 |
| Viele Fremdsprachen klingen grob und ordinär. *[Many foreign languages sound rough and vulgar.]* | interest in FL | 1 |
| Spanisch lernen ist wichtig, da mich die Leute dann mehr respektieren. *[Learning Spanish is important because people will respect me more if I speak it.]* | instrumental | 0 |
| Ich werde sehr nervös wenn ich mit Muttersprachlern Spanisch reden muss. *[I get nervous when I have to talk to native speakers of Spanish.]* | anxiety | 0 |
| Ich lerne gern Leute kennen, die Fremdsprachen sprechen. *[I like meeting people who learn foreign languages.]* | interest in FL | 0 |
| Je mehr ich spanischsprechende Leute kennen lerne, desto besser verstehe ich mich mit ihnen. *[The more I get to know Spanish-speaking people, the better I get along with them.]* | attitude | 0 |
| Ich bevorzuge Filme synchronisiert in meiner eigenen Muttersprache zu gucken, anstatt mit Untertiteln und in Originalsprache. *[I prefer watching movies synchronized in my own mother tongue rather than in original version with subtitles.]* | interest in FL | 1 |
| Man kann sich immer auf Spanier verlassen. *[You can always rely on Spanish people.]* | attitude | 0 |
| Ich fühle mich wohl wenn ich Spanisch spreche. *[I feel comfortable when I speak Spanish.]* | anxiety | 1 |
| Ich wünschte ich würde perfektes Spanisch sprechen. *[I wish I spoke perfect Spanish.]* | integrative | 0 |
| **Questions on individual 7-point scales**  **[see brackets for scales]** | | |
| Meine Motivation Spanisch zu lernen um mit Spaniern reden zu können ist: (Niedrig – Hoch)  *[My motivation to learn Spanish to be able to speak to Spanish people is: low - high]* | integrative | 0 |
| Mein Verhalten gegenüber Spaniern ist:  (unfreundlich – freundlich)  *[Mein behavior towards Spanish people is: unfriendly - friendly]* | attitude | 0 |
| Meine Interesse Fremdsprachen zu lernen ist: (niedrig – hoch)  *[My interest in learning foreign languages is: low - high]* | interest in FL | 0 |
| Meine Motivation Spanisch zu lernen aus praktischen Gründen (für einen späteren Job), ist: (schwach – stark)  *[My motivation to learn Spanish for practical reason (for a job) is: weak - strong]* | instrumental | 0 |
| Meine Nervosität, wenn ich Spanisch im Alltag spreche, ist: (niedrig – hoch)  *[My nervosity when I speak Spanish in everyday life is: low - high]* | anxiety | 0 |

# Questions regarding language use: Spanish

# T1 only

# Wie alt warst du, als du angefangen hast Spanisch zu lernen? [How old were you when you started learning Spanish?]

# Wie viele Jahre lernst du schon / hast du bisher intensiv Spanisch gelernt? [How many years have you been intensively learning Spanish?]

# Mit wem sprichst du Spanisch (in Deutschland)? [Who do you speak Spanish with (in Germany)?]

# Freunde [friends]

# Partner [partner]

# Kommilitonen [fellow students]

# Mitbewohner [house mates]

# Ich spreche fast nie Spanisch [I hardly ever speak Spanish]

# Wie hast du Spanisch gelernt? [How did you learn Spanish?]

# In der Schule [at school]

# An der Uni [at university]

# Mit Freunden [with friends]

# Durch einen Auslandsaufenthalt [through a study abroad]

# Sonstiges [other]

Zu welchem CERF Niveau hat dein letzter Spanischkurs in Deutschland geführt? [Which CERF level did you reach with your latest Spanish language course?]

- A1
- A2
- B1
- B2
- C1
- C2
- Ich habe bisher keinen Spanischkurs besucht. [I haven’t attended any Spanish language courses yet.]
- Sonstiges: [other]

T2 and T3- specific

T2: Hast du in Spanien Spanisch gesprochen?

- Ja [yes]
- Nein [no]

T3: Sprichst du noch regelmäßig Spanisch? * [Do you still regularly speak Spanish?]

Auch sporadischer Sprachgebrauch ist hier mit gemeint. *[Occasional language use also counts.]*

- Ja [yes]
- Nein [no]

T2 & T3: Zu wie viel Prozent sprichst du aktuell mit den aufgeführten Personengruppen Spanisch?

Die Summe sollte 100% ergeben. 100% reflektiert die Gesamtheit deiner Zeit, die du Spanisch sprichst, also auch wenn das stundenmäßig wenig war, geht es uns darum, wie viel von dieser Zeit du mit wem sprichst.

*[What percent of the time do you currently speak Spanish with these two groups of people? The numbers should add up to 100%. 100% reflects the entire time that you speak Spanish. Even if you speak little Spanish, we want to know to what extent you do so with whom.]*

- Spanische Muttersprachler *(Spanish native speakers)*
- Nicht-Muttersprachler *(non-native speakers of Spanish)*

T2: Hast du in Spanien einen Spanischkurs besucht? *[Did you follow a Spanish language course while abroad?]*

Zu welchem CERF Level hat dieser Kurs geführt? Und wie viele Stunden pro Woche dauerte er? *[Which CERF level did this course lead to and how many hours a week did it take?]*

**Identical for T1, T2 and T3:**

Wie schätzt du aktuell deine Spanischkenntnisse auf den folgenden Gebieten ein?

*[How do you currently judge your Spanish proficiency in these four domains?]*

1 (sehr schlecht *[very poor]*) – 7 (sehr gut, auf Muttersprachlerniveau *[very good, on a native level]*)

- Lesen (reading)
- Schreiben (writing)
- Hören (listening)
- Sprechen (speaking)

T2 & T3 only: Würdest du sagen, dass sich dein Spanisch [T2: während deines Auslandsaufenthaltes, T3: seit Rückkehr aus Spanish/Lateinamerika] verbessert oder verschlechtert hat?

*[Would you say that your Spanish improved or got worse [T2: during your study abroad, T3: since you returned from Spain]?]*

1 – stark verschlechter *[got a lot worse]* – 4 keine Veränderung *[no change]* – 7 stark verbessert *[got a lot better]*

# Questions regarding language use: English.

# T1 only

# Wie alt warst du, als du angefangen hast Englisch zu lernen? [How old were you when you started learning English?]

# Wie viele Jahre lernst du schon / hast du bisher intensiv Englisch gelernt? [How many years have you been intensively learning English?]

# Mit wem sprichst du Englisch (in Deutschland)? [Who do you speak English with (in Germany)?]

# Freunde [friends]

# Partner [partner]

# Kommilitonen [fellow students]

# Mitbewohner [house mates]

# Ich spreche fast nie Englisch [I hardly ever speak English]

# Wie hast du Englisch gelernt? [How did you learn English?]

# In der Schule [at school]

# An der Uni [at university]

# Mit Freunden [with friends]

# Durch einen Auslandsaufenthalt [through a study abroad]

# Sonstiges [other]

# T2 & T3-specific

T2: Hast du in Spanien Englisch gesprochen? [Did you speak English in Spain?]

- Ja [yes]
- Nein [no]

T3: Sprichst du noch regelmäßig Englisch? * *[Do you still regularly speak English?]*

Auch sporadischer Sprachgebrauch ist hier mit gemeint. *[Occasional language use also counts.]*

- Ja [yes]
- Nein [no ]

T2 & T3: Zu wie viel Prozent sprichst du aktuell mit den aufgeführten Personengruppen Englisch?

Die Summe sollte 100% ergeben. 100% reflektiert die Gesamtheit deiner Zeit, die du Englisch sprichst, also auch wenn das stundenmäßig wenig war, geht es uns darum, wie viel von dieser Zeit du mit wem sprichst.

*[How much percent of the time do you currently speak English with these two groups of people? The numbers should add up to 100%. 100% reflects the entire time that you speak English. Even if you speak little English, we want to know to what extent you do so with whom.]*

- Englische Muttersprachler *(English native speakers)*
- Nicht-Muttersprachler *(non-native speakers of English)*

**Identical for T1, T2 and T3:**

Wie schätzt du aktuell deine Englischkenntnisse auf den folgenden Gebieten ein?

*[How do you currently judge your English proficiency in these four domains?]*

1 (sehr schlecht *[very poor]*) – 7 (sehr gut, auf Muttersprachlerniveau *[very good, on a native level]*)

- Lesen (reading)
- Schreiben (writing)
- Hören (listening)
- Sprechen (speaking)

T2 & T3 only:

Würdest du sagen, dass sich dein Englisch [T2: während deines Auslandsaufenthaltes, T3: seit Rückkehr aus Spanish/Lateinamerika] verbessert oder verschlechtert hat?

*[Would you say that your English improved or got worse [T2: during your study abroad, T3: since you returned from Spain]?]*

1 – stark verschlechter *[got a lot worse]* – 4 keine Veränderung *[no change]* – 7 stark verbessert *[got a lot better]*

**Questions regarding language use: other foreign languages**

Wie schätzt du aktuell deine Sprachkentnisse in den folgenden Sprachen ein?

*[How do you currently judge your proficiency in the following languages?]*

*1 sehr schlecht (very poor) – 7 sehr gut, auf Muttersprachlerniveau (very good, native-like)*

- Französisch *[French]*
- Italienisch *[Italian]*
- Portugiesisch *[Portuguese]*
- Latein *[Latin]*
- Russisch *[Russian]*
- Katalanisch *[Catalan]*

**Frequency of use questions (identical at T1, T2, and T3).**

Gib an zu wie viel Prozent du aktuell die folgenden Sprachen in den angegebnen Kontexten verwendest. Jede Reihe sollte insgesamt 100% ergeben.

*[Indicate what percent of your time you currently spend using the following languages in the following contexts. The sum of each row should add up to 100%.]*

|  | Spanisch *[Spanish]* | Englisch *[English]* | Deutsch *[German]* | Andere *[other]* |
| --- | --- | --- | --- | --- |
| *SPRECHEN (z.B. mit Freunden, Familie, an der Uni, im Pub, im Restaurant, beim Einkaufen…)*  *[SPEAKING (e.g., with friends, family, at university, in the pub, at the restaurant, while shopping…)]* |  |  |  |  |
| *SCHREIBEN (z.B. E-Mails, Briefe, Formulare, Prüfungen, im Internet…)*  *[WRITING (e.g., email, letters, exams, online…)]* |  |  |  |  |
| *HÖREN (z.B. an der Uni, im Alltag, im Radio, Fernsehen, mit Freunden oder Familie …)*  *[LISTENING (e.g., at university, on the radio, tv, with friends and family …)]* |  |  |  |  |
| *LESEN (z.B. im Internet, Bücher, E-Mails…)*  *[READING (e.g., online, books, emails…)]* |  |  |  |  |

*Falls du bei der obigen Frage auch den Gebrauch anderer Sprachen angegeben hast, welche anderen Sprachen sind das?*

*[If you indicated to use other languages above, which languages are those?]*

**Language use in hours (only at T2 and T3).**

Gib an wie viele Stunden du die folgenden Sprachen in den angegeben Kontexten an einem durschnittlichen Tag verwendest. Gehe von der letzten Woche aus. Du kannst auch Bruchteile einer Stunden angeben, also 0.5 für 30 Minuten.

[*Indicate how many hours you use the following languages in the following context on an average day. Use the last week as a reference. You can also indicate fractions of an hours, e.g., 0.5 for 30 minutes.*]

|  | Spanisch *[Spanish]* | Englisch *[English]* | Deutsch *[German]* | Andere *[other]* |
| --- | --- | --- | --- | --- |
| Lesen von Büchern, Zeitschriften, Webseitinhalten etc.  *[Reading of books, magazines, website content etc.]* |  |  |  |  |
| Filme schauen, Radio/ Podcasts /  Hörbücher hören  *[watching movies, listening to radio / podcasts / audio books]* |  |  |  |  |
| Kurse an der Uni / Interaktion mit anderen Studenten an der Uni  *[Courses at university, interaction with other students at uni]* |  |  |  |  |
| Interaktion mit Freunden (auf Partys, in Bars, im Café, Dates etc.)  *[Interaction with friends, at parties, in bars, at cafes, on dates, etc.]* |  |  |  |  |
| Interaktion mit Mitbewohnern  *[interaction with house mates]* |  |  |  |  |
| Interaktion mit Partner(in)  *[interaction with partner]* |  |  |  |  |
| T2-specific:  Interaktion mit Freunden und Familie in Deutschland  *[interaction with friends and family in Germany]* |  |  |  |  |
| T3-specific:  Interaktion mit Freunden in Spanien  *[interaction with friends in Spain]* |  |  |  |  |

Hast du noch Kommentare zu deinem Sprachgebrauch?

*[Do you have any other comments on your language use?]*

**Language use by groups of people (only at T2 and T3).**

Welche Sprachen hast du mit den aufgelisteten Personengruppen [T2: im Ausland; T3: in Deutschland] gesprochen? Gib pro Gruppe an zu wie viel Prozent du mit dieser Gruppe die entsprechenden Sprachen gesprochen hast. Pro Gruppe sollte die Summe 100 % betragen. Die Summe pro Sprachspalte kann mehr als 100% sein. Wenn du beispielsweise mit Spaniern immer Spanisch gesprochen hast, und mit internationalen Studenten 20% der Zeit Spanisch gesprochen hast, wäre die Summe der Spanischspalte 120 - das ist völlig ok, solange die Summe pro Reihe, also pro Gruppe 100% ergibt.

*[Which languages did you use with which group of people [T2: while abroad, T3: while back in Germany]? For each group, indicate what percentage of time you spoke to this group in each of the languages. The sum of percentages per group should be 100%. The sum of all percentages for the different languages can in turn be higher than 100%. If you, for example, always spoke Spanish with Spanish people and with international people you spoke Spanish 20% of the time, the sum for Spanish would be 120 %. This is ok, as long as the sum for each group equals 100%.]*

|  | Spanisch *[Spanish]* | English *[English]* | Deutsch *[German]* | Andere *[other]* |
| --- | --- | --- | --- | --- |
| Spanische Muttersprachler  *[Spanish native speakers]* |  |  |  |  |
| Deutsche Muttersprachler  *[German native speakers]* |  |  |  |  |
| Andere (nicht Deutsche) international Studenten  *[other, non-German international students]* |  |  |  |  |

**S6. Descriptive Statistics for Separate Predictors by Session**

| **Predictor name** | **T1** | | | **T2** | | | **T3** | | |
| --- | --- | --- | --- | --- | --- | --- | --- | --- | --- |
|  | *M* | *SD* | *Range* | *M* | *SD* | *Range* | *M* | *SD* | *Range* |
| Frequency of use (%) |  | | |  | | |  | | |
| Spanish | 31.91 | 21.78 | 0-87.5 | 45.20 | 18.61 | 5-90 | 10.63 | 10.20 | 0-48.75 |
| English | 19.39 | 14.00 | 0-61.25 | 17.93 | 14.86 | 0-67.5 | 15.59 | 12.89 | 0-50 |
| German | 48.41 | 23.53 | 3.75-100 | 36.61 | 17.22 | 5-78.75 | 72.69 | 15.87 | 32.5-96.25 |
| English-German ratio | 0.66 | 1.01 | 0-8.67 | 0.77 | 1.11 | 0-7 | 0.26 | 0.29 | 0-1.18 |
| Fluency (number of words produced) |  | | |  | | |  | | |
| English letter | 11.10 | 3.84 | 2-21 | 9.60 | 3.48 | 2-21 | 10.62 | 4.49 | 4-24 |
| English category | 12.09 | 3.88 | 2-23 | 12.47 | 3.73 | 2-25 | 14.49 | 4.03 | 2-31 |
| German letter | 10.99 | 3.67 | 2-23 | 13.89 | 3.83 | 5-24 | 15.36 | 4.23 | 5-28 |
| German category | 15.69 | 3.29 | 8-24 | 13.63 | 3.91 | 3-29 | 19.87 | 4.75 | 11-35 |
| Motivation (scale from 1 – 7) |  | | |  | | |  | | |
| integrative | 5.97 | 0.45 | 4.92-6.83 | 5.90 | 0.53 | 4.35-6.79 | 5.85 | 0.64 | 1.96-6.83 |
| instrumental | 4.58 | 1.09 | 2.2-7 | 4.55 | 1.12 | 1.8-7 | 4.47 | 1.21 | 1.6-7 |
| anxiety | 3.74 | 1.31 | 1.16-7 | 3.08 | 1.13 | 1-6.17 | 3.17 | 1.24 | 1-6.5 |
| Amount of native Spanish input (based on only 47 participants) | - | - | - | 73.30 | 19.84 | 20-95 | 68.47 | 32.43 | 5-100 |
| Average performance in Spanish vocabulary test | 50.26 | 18.85 | 16.81-90.17 | 66.65 | 16.75 | 22.96-93.65 | 62.54 | 19.07 | 19.23-94.55 |

**S7. Correlation Matrices for Separate Predictors**

**Frequency of use measures**

*Figure S7.1.* Pearson correlation matrix for frequency of use measures per domain at T2 and T3. Color and circle size reflect the strength of the correlation with shades of red indicating positive and shades of blue indicating negative correlations.

**Motivation scores**

*Figure S7.2.* Pearson correlation matrix for motivation questionnaire scores per question category at T2 and T3. Color and circle size reflect the strength of the correlation with shades of red indicating positive and shades of blue indicating negative correlations.

**S8. Doors stimuli**

From the available set of 100 door display pairs (target displays and 4 AFC displays), we selected the following 30 pairs (numbers refer to slide numbers in the original PowerPoint files, available here: <https://www.york.ac.uk/res/doors/resources.shtml> ): 1,2,9,10,11,12,19,20,21,22,87,88,27,28,41,42,47,48,51,52,53,54,71,72,75,76,81,82,85,86,91,92,97,98,99,100,123,124,129,130,133,134,141,142,143,144,145,146,155,156,169,170,179,180,181,182,193,194,195,196.

**S9. Model comparisons**

| **Model** | **AIC** | **BIC** | **χ2** | **P(χ2)** |
| --- | --- | --- | --- | --- |
| **Baseline model** | | | | |
| ~ Sess | 109664.85 | 109697.61 | *NA* | *NA* |
| **Participant-level predictors** | | | | |
| ~ Sess * Spanish frequency of use | 109393.41 | 109442.53 | 275.45 | **<.001** |
| ~ Sess * English/German ratio | 109667.49 | 109716.61 | 1.37 | 0.505 |
| ~ Sess * Amount Spanish experience | 109595.00 | 109644.00 | 73.62 | **<.001** |
| ~ Sess * German letter fluency | 109662.30 | 109711.43 | 6.55 | **0.038** |
| ~ Sess * English letter fluency | 109633.99 | 109683.12 | 34.87 | **<.001** |
| ~ Sess * Germany category fluency | 109664.73 | 109713.86 | 4.12 | 0.127 |
| ~ Sess * English category fluency | 109659.51 | 109708.64 | 9.34 | **0.009** |
| ~ Sess * Integrative motivation | 109625.60 | 109674.73 | 43.26 | *<.001** |
| ~ Sess * Anxiety | 109620.26 | 109669.38 | 48.60 | *<.001** |
| ~ Sess * Instrumental motivation | 109587.20 | 109636.33 | 81.65 | **<.001** |
| ~ Sess * Attrition judgment | 109559.07 | 109608.19 | 109.79 | **<.001** |
| ~ Sess * Spanish AoA | 109665.32 | 109714.45 | 3.53 | 0.171 |
| ~ Sess * LTM capacity | 109667.86 | 109716.99 | 0.99 | 0.608 |
| ~ Sess * T2 performance | 109312.79 | 109361.91 | 356.07 | **<.001** |
| **Item-level predictors** | | | | |
| ~ Sess * Spanish log frequency | 109619.90 | 109669.00 | 49.00 | **<.001** |
| ~ Sess * German log frequency | 109636.45 | 109685.58 | 32.41 | <.001† |
| ~ Sess * Cognate status | 109627.19 | 109676.32 | 41.67 | **<.001** |

*Note.* Green rows reflect the predictors that entered the final model. * We chose 1 of the three motivation subscores for the final model despite the fact that they all improved model fit. We selected instrumental motivation because it has the lowest AIC and BIC values out of the three. † Both German and Spanish log frequency counts were predictive of forgetting, yet in a direct comparison, Spanish log frequency was the better predictor (*p* < .001).

**S10. Correlation matrix for predictors including Input Type**

This is the full predictor correlation matrix for the subset of participants for whom we have information about the type of input they received (Spanish native vs. non-native, N = 49).

*Figure S10.* Pearson correlation matrix for all 14 participant-level predictors from the additional analysis with input type as extra predictor (N = 49). Colors indicate the strength of the correlation (Pearson’s *r*) with shades of blue indicating negative and shades of red indicating positive correlations.

**S11. Predictor Plots for Significant Interaction Terms in GLM**

**
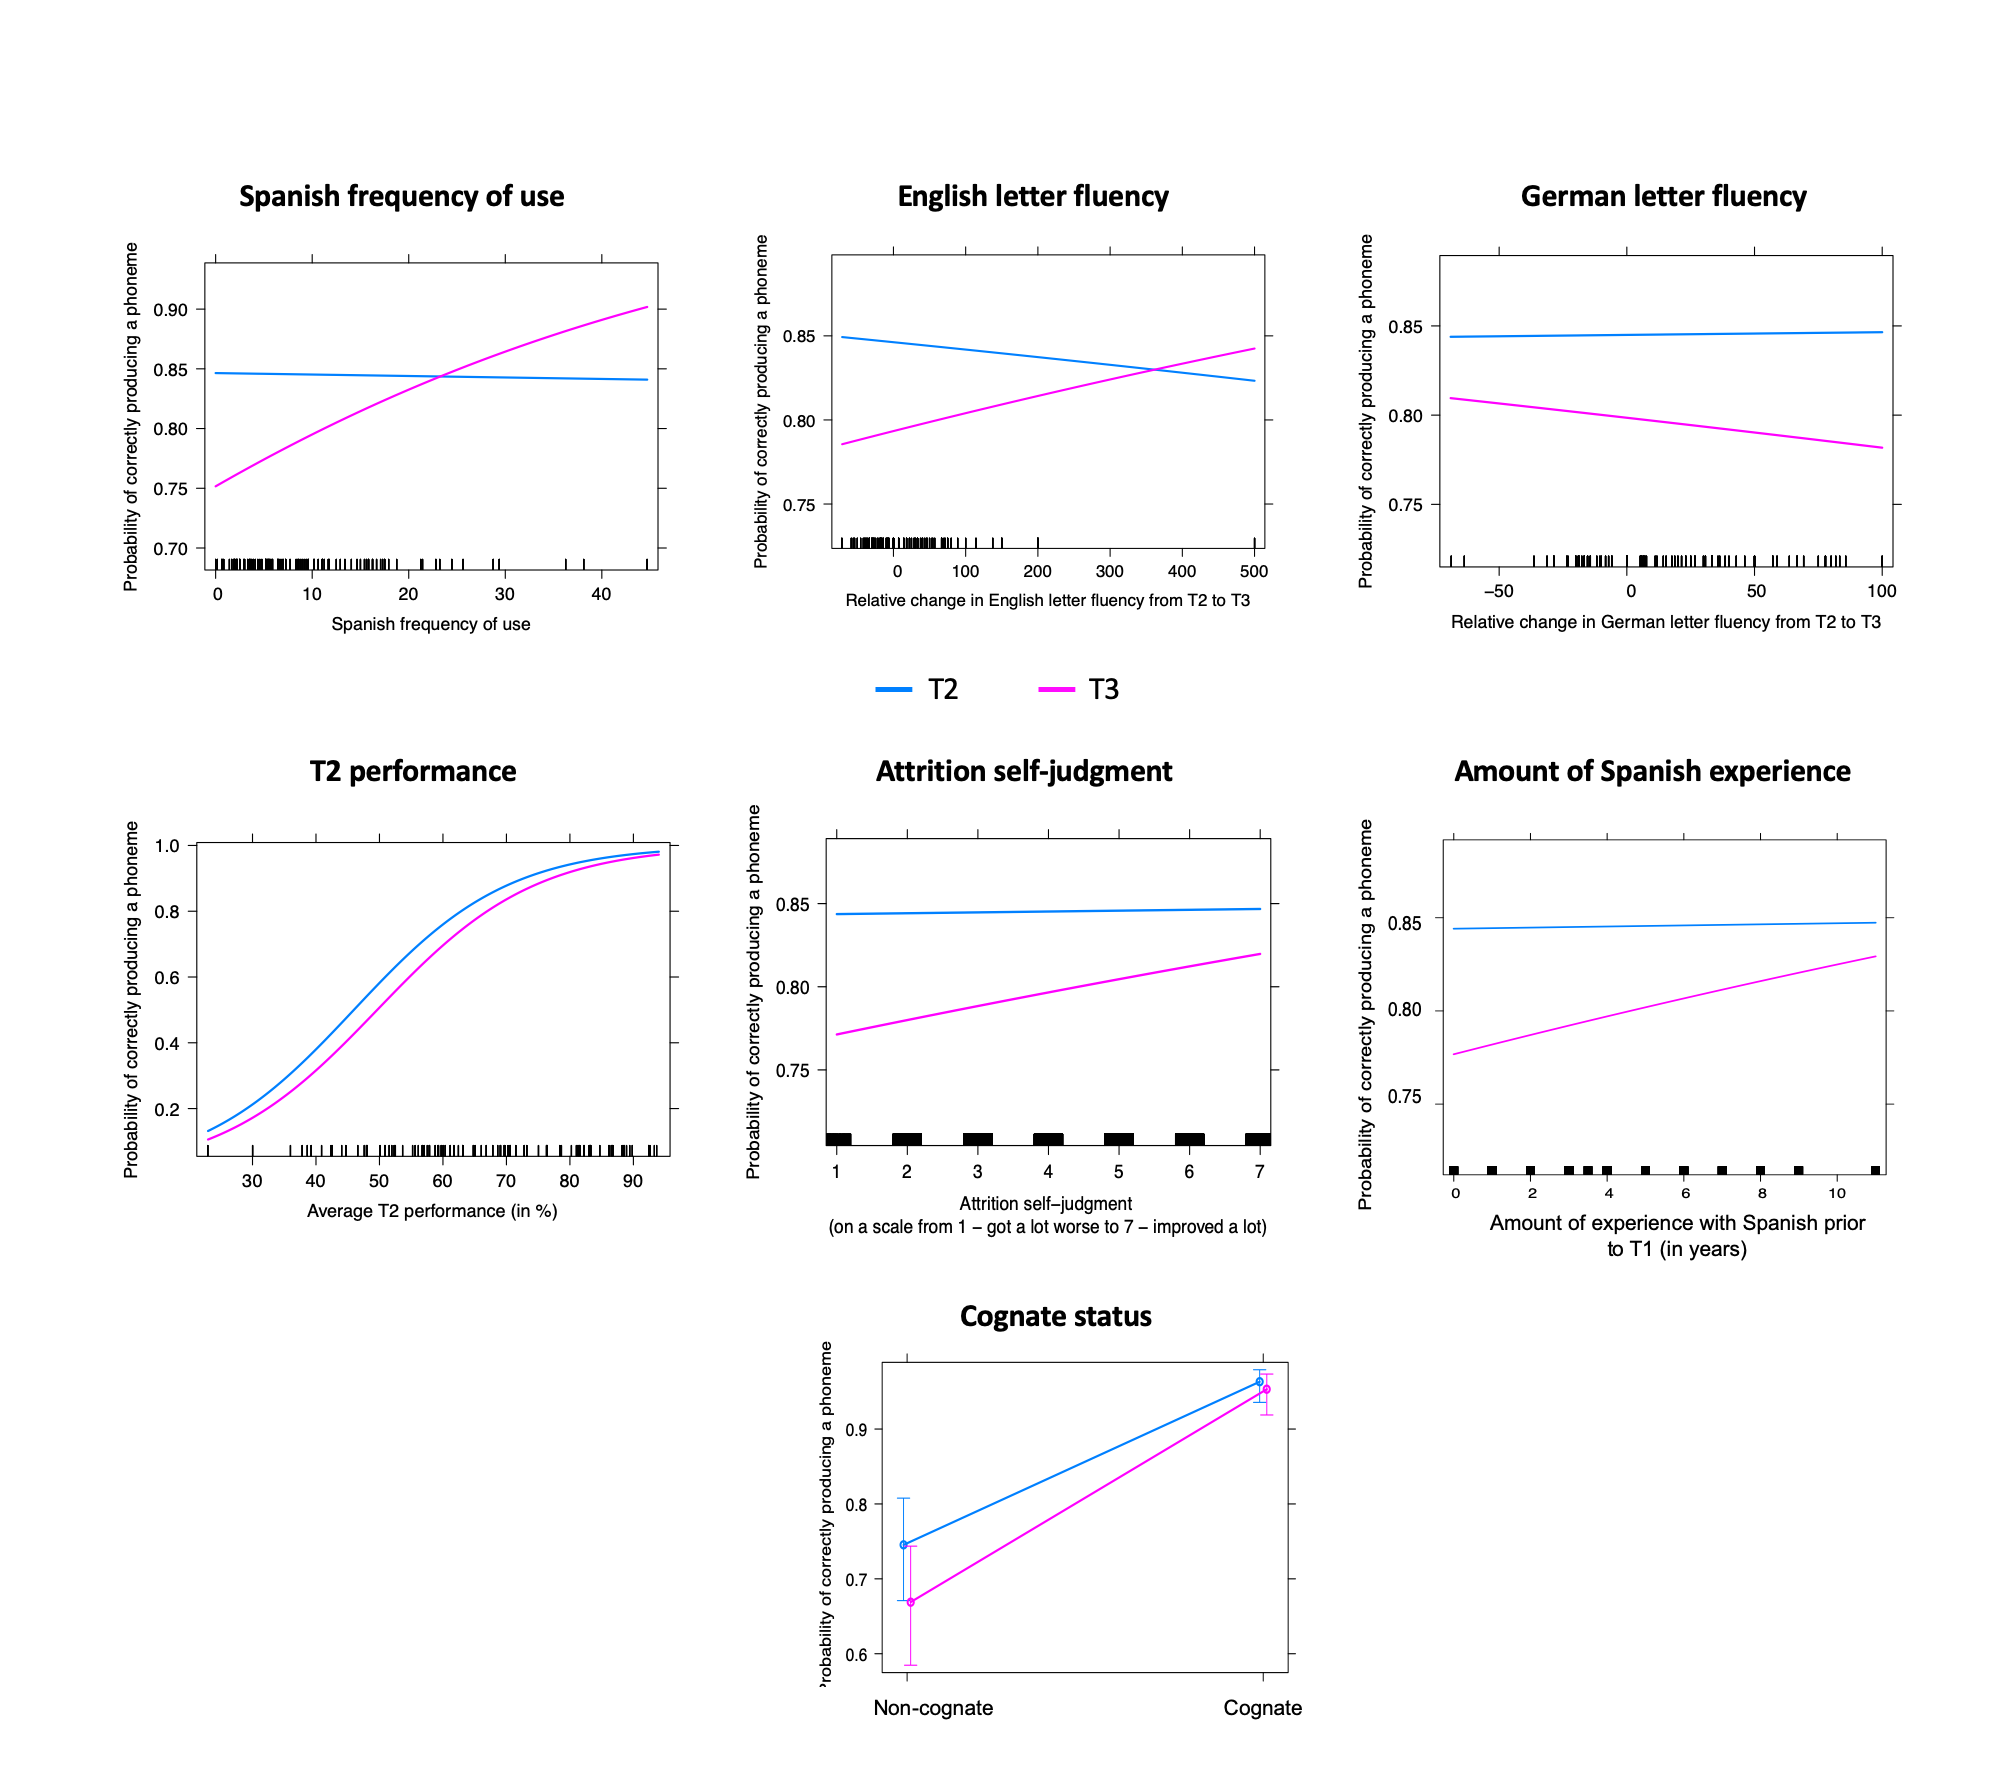
**

*Figure S11.* Predictor plots for significant interaction terms derived from the logistic regression model outcome reported in the main manuscript (Table 5). Effects are plotted on the response scale (i.e., they were back-transformed from the logit scale to the probability scale for easier interpretation) separately for T2 and T3. Bars on the bottom of plots represent data points (i.e., participants).
